# Supplementary material for: Microbial Communities of Artisanal Fermented Milk Products from Russia
Source: MDPI journal article supplement (doi:10.3390/microorganisms10112140), 2022-10-29
Supplement: s1 [file s1]

## **SUPPLEMENTARY MATERIAL**

### **Supplementary Material Content**

**Supplementary Table S1.** Accession numbers of SRA used in this work (excel file).

**Supplementary Table S2.** Concentration of volatile fatty acids (mM) in fermented milk products.

**Supplementary Table S3.** Resulting number of reads per sample after filtering, denoising and chimera removal (excel file).

**Supplementary Figure S1.** Rarefaction curves calculated for 55 fermented milk product samples. A - curves for aarts (AA), khurunga (KR), koumiss (KM) and shubat (SB) samples; B - curves for ayran (AR) and kefir (KF) samples; C - curves for prostokvasha (PS) samples; D - curves for matsoni-like product (MC), ryazhenka (RZ), tan (TA) and chegen (CG) samples; E - curves for sour-cream (SN+SM) samples; F - curves for cottage cheese (TG) samples; G - curves for bryndza (BZ) samples; H - curves for suluguni-like cheese (SU) and khuruud (KU) samples.

**Supplementary Figure S2:** FMP microbiomes dissimilarity displayed by NMDS plots (stress value = 0.13). Color grading corresponds to the concentrations of lactate (A), acetate (B), succinate (C), propionate (D), formate (E), *n*-butyrate (F). Gray color of samples indicates that VFA concentration was not measured in these samples. Red vectors indicate the correlation of the dominant genera abundance with the axes of ordination and their statistical significance based on a permutation test (1000 permutations, P-value < 0.05) i. e., demonstrate the strength and direction (within the present coordinates) of influence of certain bacterial taxa on samples clustering.

**Supplementary Figure S3.** Distribution of the 62 most abundant ASV on the genus level for beverages.

**Supplementary Figure S4.** Distribution of the 62 most abundant ASV on the genus level for cheeses and creamy products.

**Supplementary Table S2.** Concentration of volatile fatty acids (mM) in fermented milk products.

| Sample type       | Location                     | Sample acronym | Succinate | Lactate | Formate | Acetate | Propionate | n-Butyrate | Total VFA |
|-------------------|------------------------------|----------------|-----------|---------|---------|---------|------------|------------|-----------|
|                   |                              |                | mM        |         |         |         |            |            |           |
| Beverages         |                              |                |           |         |         |         |            |            |           |
| Aarts (AA)        | Buryatia Republic            | 25AA           | 6.79      | 293.26  | 1.23    | 64.28   | 0.00       | 0.00       | 365.55    |
| Khurunga (KR)     | Buryatia Republic            | 18KR           | 0.00      | 188.31  | 0.00    | 58.33   | 0.00       | 0.00       | 246.64    |
|                   |                              | 26KR           | 4.83      | 233.64  | 0.72    | 43.26   | 0.00       | 1.41       | 283.86    |
| Koumiss (KM)      | Buryatia Republic            | 31KM           | 10.86     | 206.03  | 0.00    | 45.83   | 0.00       | 0.00       | 262.71    |
| Ayran (AR)        | Karachay-Cherkessia Republic | 3AR            | 0.42      | 149.20  | 0.00    | 13.07   | 0.21       | 0.00       | 162.90    |
|                   |                              | 5AR            | 0.20      | 174.82  | 0.00    | 9.45    | 0.00       | 0.00       | 184.47    |
|                   | Stavropol Region             | 6AR            | 0.21      | 88.42   | 0.00    | 12.27   | 0.42       | 0.00       | 101.31    |
|                   |                              | 13AR           | 1.16      | 102.39  | 0.47    | 7.68    | 0.23       | 0.00       | 111.94    |
|                   |                              | 15AR           | 0.00      | 97.30   | 0.00    | 19.46   | 0.78       | 0.00       | 117.54    |
|                   | Altai Republic               | 78AR           | *         | *       | *       | *       | *          | *          | *         |
| Kefir (KF)        | Stavropol Region             | 7KF            | 0.00      | 167.14  | 0.00    | 8.21    | 0.20       | 0.40       | 175.95    |
|                   | Primorsky Region             | 25KF           | 0.98      | 86.46   | 0.59    | 26.33   | 0.20       | 0.00       | 114.56    |
| Prostokvasha (PS) | Arkhangelsk Region           | 16PS           | 0.59      | 176.06  | 1.96    | 22.40   | 0.20       | 0.00       | 201.21    |
|                   | Tula Region                  | 17PS           | 0.00      | 162.81  | 2.23    | 27.26   | 0.00       | 0.00       | 192.30    |
|                   | Dagestan Republic            | 29PS           | 12.82     | 126.35  | 0.94    | 68.18   | 5.94       | 0.00       | 214.23    |
|                   |                              | 37PS           | 8.56      | 82.36   | 1.60    | 36.90   | 11.23      | 0.00       | 140.65    |
|                   |                              | 46PS           | 6.46      | 116.68  | 0.97    | 56.24   | 1.29       | 0.00       | 181.65    |
|                   |                              | 66PS           | 5.28      | 190.73  | 1.13    | 29.40   | 2.26       | 0.00       | 228.80    |
|                   |                              | 69PS           | 4.76      | 165.86  | 1.10    | 30.02   | 0.00       | 0.00       | 201.74    |
|                   |                              | 74PS           | 0.00      | 123.08  | 1.05    | 0.00    | 2.80       | 0.00       | 126.93    |
| Ryazhenka (RZ)    | Stavropol Region             | 13RZ           | 0.63      | 451.54  | 0.32    | 31.69   | 0.00       | 0.00       | 484.18    |
|                   | Tula Region                  | 17RZ           | 0.00      | 249.62  | 0.00    | 19.09   | 0.55       | 0.00       | 269.26    |

|                     |                              |      |       |        |      |        |       |      |        |
|---------------------|------------------------------|------|-------|--------|------|--------|-------|------|--------|
|                     | Primorsky Region             | 25RZ | 0.00  | 213.45 | 0.00 | 216.47 | 3.22  | 0.00 | 433.14 |
| Shubat (SB)         | Altai Republic               | 77SB | *     | *      | *    | *      | *     | *    | *      |
| Tan (TA)            | Primorsky Region             | 22TA | 0.00  | 18.95  | 1.80 | 4.99   | 0.60  | 0.00 | 26.33  |
| Creamy products     |                              |      |       |        |      |        |       |      |        |
| Chegen (CG)         | Altai Republic               | 75CG | *     | *      | *    | *      | *     | *    | *      |
|                     |                              | 76CG | *     | *      | *    | *      | *     | *    | *      |
| Matsoni-like (MC)   | Karachay-Cherkessia Republic | 5MC  | 0.29  | 93.78  | 0.00 | 9.18   | 0.57  | 0.00 | 103.82 |
|                     | Stavropol Region             | 13MC | 1.66  | 126.69 | 0.55 | 9.70   | 0.28  | 0.28 | 139.16 |
| Sour cream (SN+SM)  | Stavropol Region             | 6SN  | 2.08  | 192.13 | 0.00 | 53.41  | 5.55  | 0.00 | 253.17 |
|                     |                              | 7SN  | 1.40  | 127.76 | 0.00 | 50.54  | 6.32  | 0.00 | 186.02 |
|                     |                              | 15SN | 11.26 | 159.71 | 0.00 | 45.03  | 1.41  | 0.00 | 217.41 |
|                     | Kabardino-Balkarian Republic | 14SN | 1.32  | 149.46 | 0.00 | 55.55  | 5.29  | 0.66 | 212.28 |
|                     | Tula Region                  | 20SN | 6.22  | 296.10 | 0.00 | 77.14  | 7.46  | 0.00 | 386.92 |
|                     | Buryatia Republic            | 20SM | 8.80  | 134.02 | 2.97 | 18.46  | 5.21  | 0.00 | 169.46 |
|                     |                              | 22SM | 8.88  | 249.58 | 4.35 | 75.41  | 0.00  | 0.00 | 338.21 |
| Cottage cheese (TG) | Karachay-Cherkessia Republic | 3TG  | 0.56  | 224.72 | 0.00 | 153.17 | 3.91  | 0.00 | 382.36 |
|                     |                              | 5TG  | 5.00  | 317.46 | 0.00 | 56.24  | 0.62  | 0.00 | 379.33 |
|                     | Stavropol Region             | 6TG  | 0.44  | 248.14 | 0.00 | 29.60  | 2.61  | 0.00 | 280.79 |
|                     |                              | 7TG  | 8.01  | 399.62 | 0.00 | 71.38  | 1.33  | 0.00 | 480.34 |
|                     |                              | 15TG | 0.00  | 323.91 | 0.60 | 79.16  | 17.52 | 0.00 | 421.20 |
|                     | Kabardino-Balkarian Republic | 14TG | 4.48  | 305.93 | 0.00 | 96.26  | 0.75  | 0.00 | 407.41 |
|                     | Arkhangelsk Region           | 16TG | 0.49  | 147.87 | 0.00 | 13.35  | 0.00  | 0.49 | 162.21 |
|                     | Tula Region                  | 17TG | 2.59  | 68.99  | 0.00 | 18.11  | 1.29  | 0.00 | 90.98  |
|                     |                              | 20TG | 5.91  | 215.65 | 0.00 | 41.36  | 1.18  | 0.00 | 264.10 |

|                                |                              |      |       |        |      |        |      |      |        |
|--------------------------------|------------------------------|------|-------|--------|------|--------|------|------|--------|
|                                | Buryatia Republic            | 30TG | 47.94 | 238.69 | 3.05 | 60.55  | 0.00 | 0.00 | 350.23 |
| <b>Cheeses</b>                 |                              |      |       |        |      |        |      |      |        |
| Bryndza (BZ)                   | Karachay-Cherkessia Republic | 3BZ  | 0.00  | 813.64 | 3.66 | 76.24  | 5.49 | 0.00 | 899.03 |
|                                |                              | 5BZ  | 0.00  | 662.71 | 0.00 | 69.97  | 3.04 | 0.00 | 735.72 |
|                                | Stavropol Region             | 7BZ  | 0.49  | 350.96 | 0.00 | 65.47  | 0.98 | 0.00 | 417.90 |
|                                |                              | 15BZ | 0.00  | 539.41 | 0.59 | 74.97  | 0.59 | 0.00 | 615.55 |
|                                | Kabardino-Balkarian Republic | 14BZ | 0.00  | 626.80 | 0.55 | 83.10  | 0.00 | 0.00 | 710.45 |
| Suluguni-like salt cheese (SU) | Karachay-Cherkessia Republic | 3SU  | 1.77  | 448.35 | 0.59 | 69.52  | 0.00 | 0.00 | 520.22 |
|                                |                              | 5SU  | 3.34  | 213.75 | 0.00 | 74.15  | 0.00 | 0.00 | 291.24 |
|                                | Stavropol Region             | 6SU  | 38.79 | 368.97 | 0.00 | 122.41 | 3.45 | 0.00 | 533.62 |
| Khuruud (KU)                   | Buryatia Republic            | 29SR | 5.67  | 126.41 | 0.00 | 31.81  | 0.00 | 0.00 | 163.89 |

\*- VFAs concentration of samples from Altai Republic (Ayran 78AR, Chegen 75CG, 76CG and Shubat 77SB) was not measured.

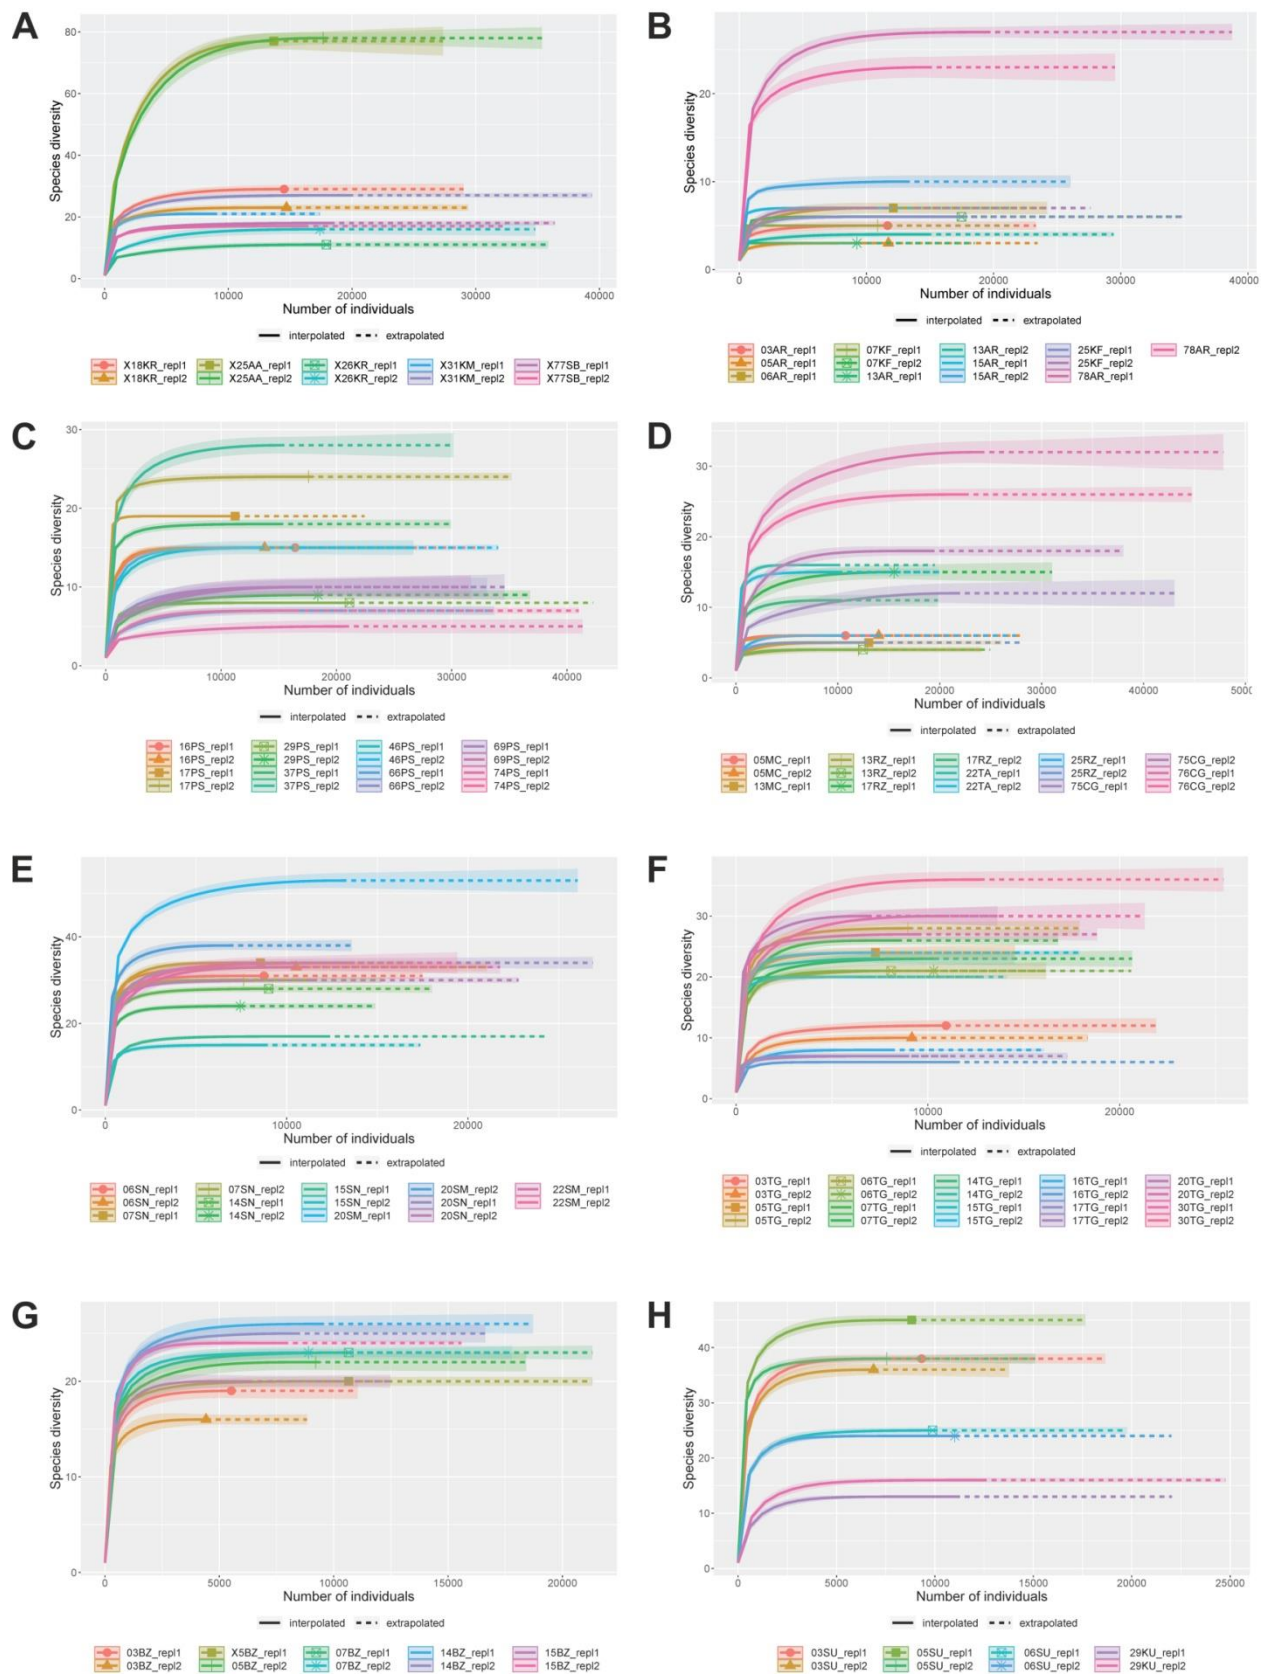

**Supplementary Figure S1.** Rarefaction curves calculated for 55 fermented milk product samples. A – curves for aarts (AA), khurunga (KR), koumiss (KM) and shubat (SB) samples; B – curves for ayran (AR) and kefir (KF) samples; C – curves for prostokvasha (PS) samples; D – curves for matsoni-like product (MC), ryazhenka (RZ), tan (TA) and chegen (CG) samples; E – curves for sour-cream (SN+SM) samples; F – curves for cottage cheese (TG) samples; G – curves for bryndza (BZ) samples; H – curves for suluguni-like cheese (SU) and khuruud (KU) samples.

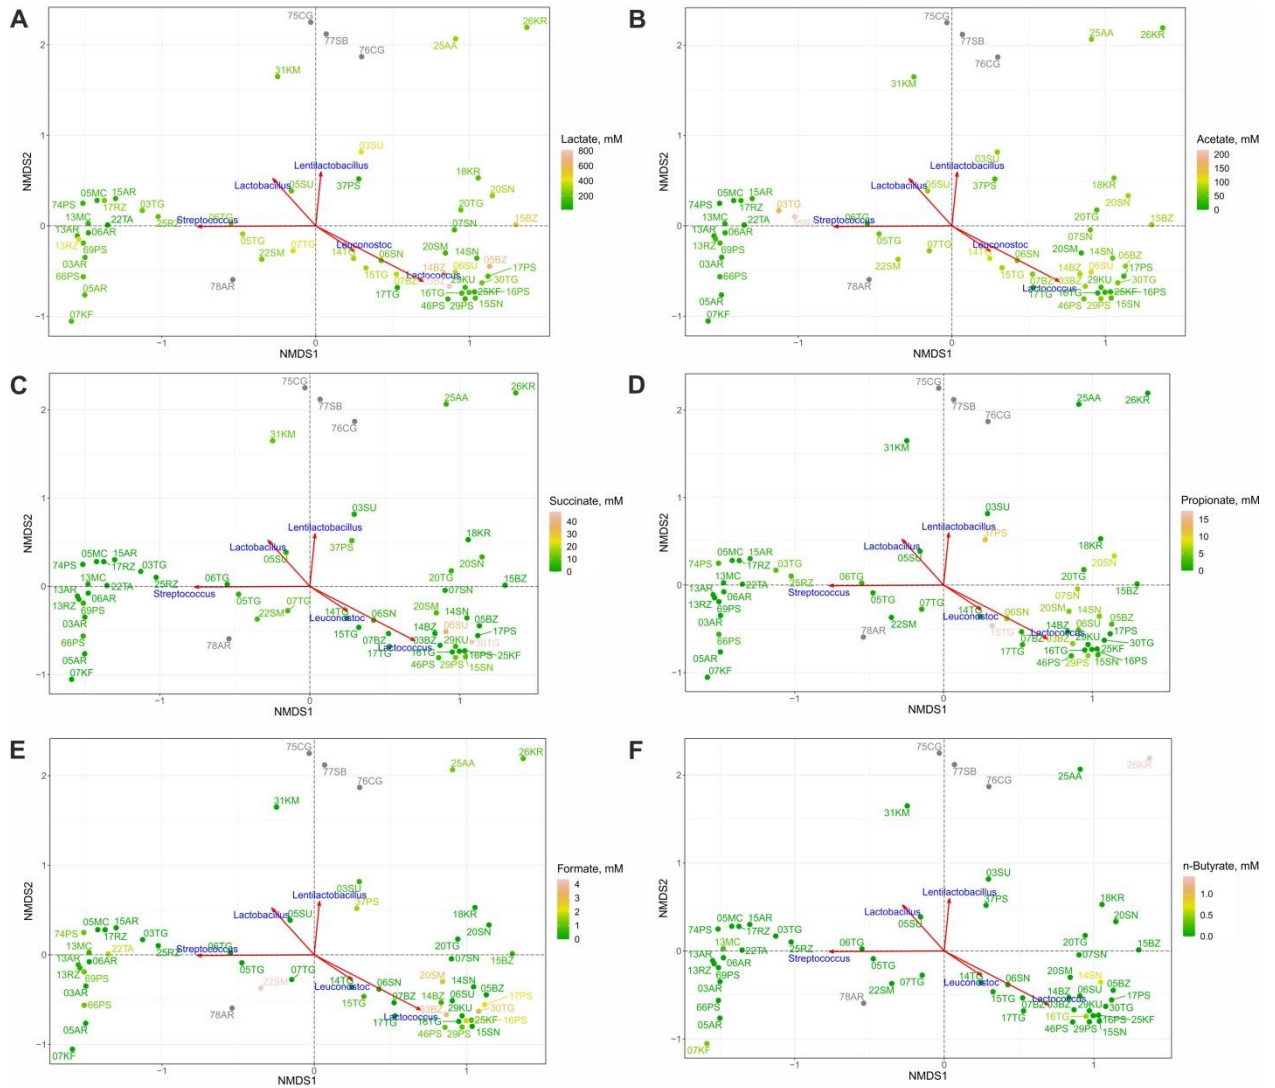

**Supplementary Figure S2:** FMP microbiomes dissimilarity displayed by NMDS plots (stress value = 0.13). Color grading corresponds to the concentrations of lactate (A), acetate (B), succinate (C), propionate (D), formate (E), *n*-butyrate (F). Gray color of samples indicates that VFA concentration was not measured in these samples. Red vectors indicate the correlation of the dominant genera abundance with the axes of ordination and their statistical significance based on a permutation test (1000 permutations,  $P$ -value < 0.05) i. e., demonstrate the strength and direction (within the present coordinates) of influence of certain bacterial taxa on samples clustering.



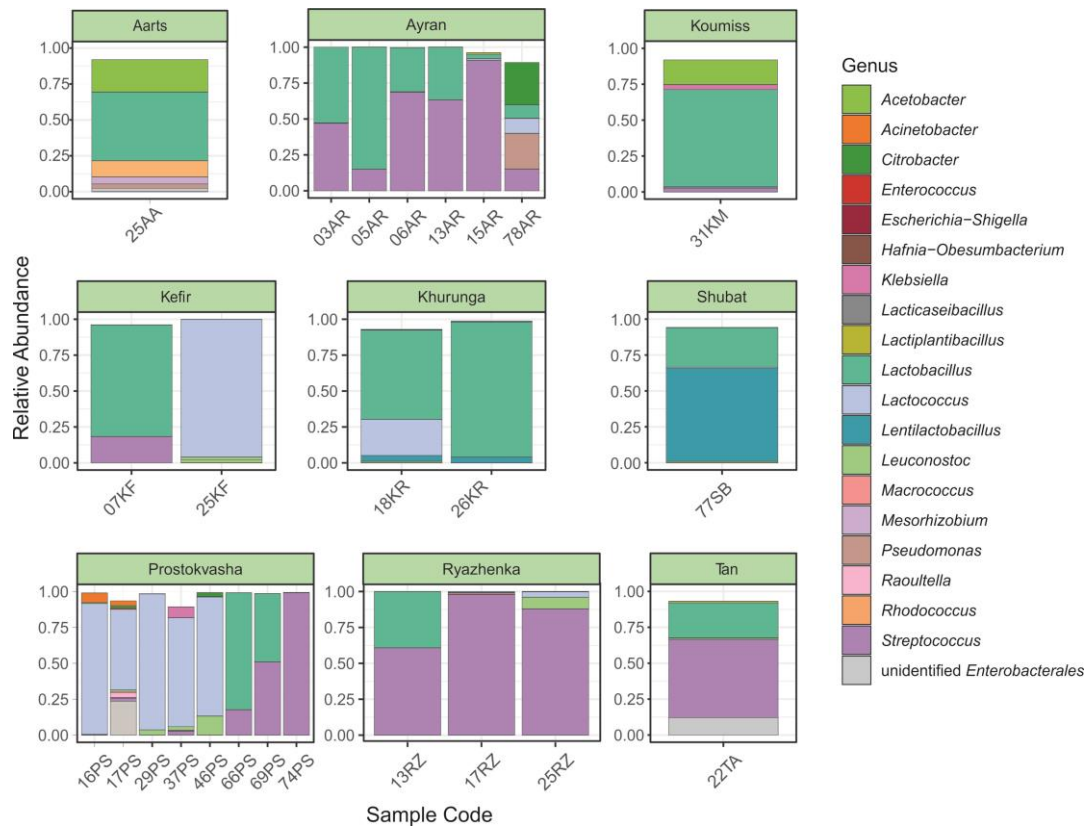

**Supplementary Figure S3.** Distribution of the 62 most abundant ASV on the genus level for beverages.

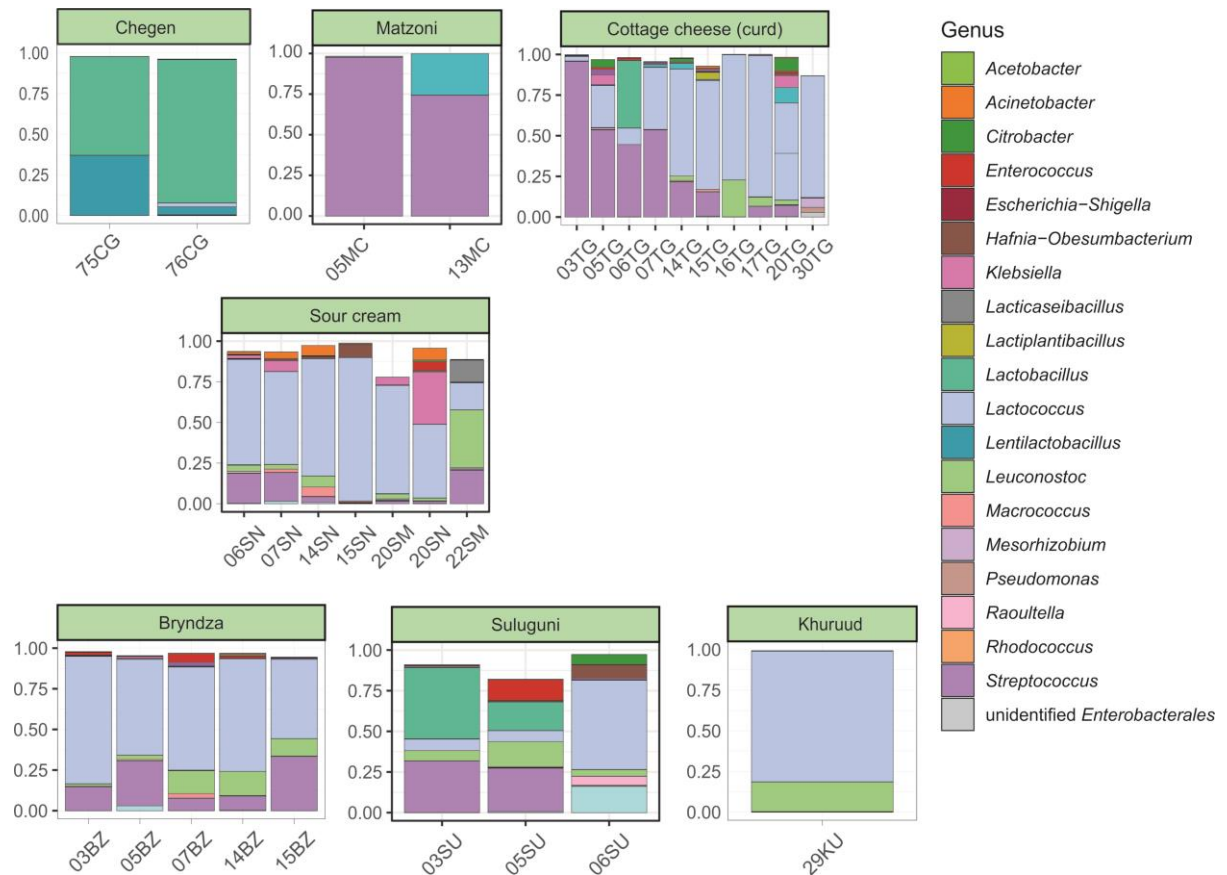

**Supplementary Figure S4.** Distribution of the 62 most abundant ASV on the genus level for cheeses and creamy products.
